# Supplementary material for: More Cercospora Species Infect Soybeans across the Americas than Meets the Eye
Source: PubMed Central journal article supplement (PMC4529236; doi:10.1371/journal.pone.0133495), 2015-08-07
Supplement: pone.0133495.s002.pdf [file pone.0133495.s002.pdf]

**S1 Table.** Detailed information on PCR primers used in this study.

| Target genes                                       | Primer pairs                                                                            | Ta* | Amplicon size (bp) | Reference              |
|----------------------------------------------------|-----------------------------------------------------------------------------------------|-----|--------------------|------------------------|
| <i>act</i> (actin)                                 | ACT-512F (5'-ATGTGCAAGGCCGGTTTCGC-3')<br>ACT-783R (5'-TACGAGTCCTTCTGGCCCAT-3')          | 53  | 226                | [6]<br>[6]             |
| <i>cfp</i> (cercosporin facilitator protein)       | F1771 (5'-ATTGGTTGGAGCGACTTTTG-3')<br>R2706 (5'-CAGGACAGTCTGGACAGCAA-3')                | 56  | 935                | This work<br>This work |
|                                                    | cfp_F1 (5'-GCCGATCGATTGCAGGAGTTGGC-3')<br>cfp_R1 (5'-TTGCTGATCCAAGTAGTCGGACG-3')        | 58  | 696                | This work<br>This work |
| <i>cal</i> (calmodulin)                            | CAL-228F (5'-GAGTTCAAGGAGGCCTTCTCCC-3')<br>CAL-737R (5'-CATCTTTCTGGCCATCATGG-3')        | 56  | 561                | [6]<br>[6]             |
| <i>his</i> (histone H3)                            | CYLH3F (5'-AGGTCCACTGGTGGCAAG-3')<br>CYLH3R (5'-AGCTGGATGTCCTTGGACTG-3')                | 57  | 412                | [6]<br>[6]             |
| ITS (internal transcribed spacers +5.8S nrDNA)     | ITS1 (5'-TCCGTAGGTGAACCTGCGG-3')<br>ITS4 (5'-TCCTCCGCTTATTGATATGC-3')                   | 51  | 560                | [6]<br>[6]             |
| <i>tef</i> (translation elongation factor 1-alpha) | TEF_F1 (5'-CCGGCAAGTCGACAACCACCG-3')<br>TEF_R1 (5'-TCACGGTGACCTGGGGCGTC-3')             | 57  | 605                | This work<br>This work |
| <i>tub</i> ( $\beta$ -tubulin 1)                   | Ck_Betatub-F1 (5'-TGCGTGAAATCGTGAGTCCTCAC-3')<br>Bt516R (5'-ACGAAGTTGTCTGGGCGGAAAAG-3') | 67  | 538                | This work<br>[25]      |
|                                                    | Tub-F1 (5'-GGTCATTACACTGAGGGTGC-3')<br>Tub-R1 (5'-GACAAGATCGTTCATGTTGGACTC-3')          | 56  | 834                | [30]<br>[30]           |
| <i>cyb</i> (mitochondrial cytochrome b)            | Cytb-F2 (5'-GGAAGAGGTCTATACTATGG-3')<br>Cytb-R1 (5'-CGTGATTAGCACCTAATTGC-3')            | 45  | 696                | [28]<br>[28]           |

\*Ta = Annealing temperature (°C)
